# Supplementary material
Source: PubMed Central journal article supplement (PMC1569456)
Supplement: rstb20041587s01.pdf [file rstb20041587s01.pdf]

## **ELECTRONIC APPENDIX**

This is the Electronic Appendix to the article

Biodiversity trends in Europe: development and  
testing of a species trend indicator for evaluating  
progress towards the 2010 target  
by

M. de Heer, V. Kapos and B.J.E. ten Brink

*Phil. Trans. R. Soc. B* (doi:10.1098/rstb.2004.1587)

Electronic appendices are refereed with the text; however, no attempt is made  
to impose a uniform editorial style on the electronic appendices.
